# Supplementary material for: Interfacial integration of ultra-thin flexible electrochemical capacitors via vacuum filtration based on gelatinized fibrous membranes
Source: Royal Society of Chemistry journal article supplement (doi:10.1039/d4ta05110f), 2024-01-01
Supplement: d4ta05110f2.pdf [file d4ta05110f2.pdf]

## Interfacial Integration of Ultra-Thin Flexible Electrochemical Capacitors via Vacuum Filtration based on Gelatinized Fibrous Membranes

Qian Xie<sup>‡1</sup>, Chengjie Lu<sup>‡1</sup>, Chengjie Yi<sup>1</sup>, Tao Shui<sup>1</sup>, Nosipho Moloto<sup>2</sup>, Jiacheng Liu<sup>3</sup>, Song-Zhu Kure-Chu<sup>3</sup>, Takehiko Hihara<sup>3</sup>, Wei Zhang<sup>1\*</sup>, ZhengMing Sun<sup>1</sup>

<sup>1</sup>School of Materials Science and Engineering, Southeast University, Nanjing, 211189, China.

<sup>2</sup>Molecular Science Institute, School of Chemistry, University of the Witwatersrand, Private Bag 3, Wits2050, South Africa.

<sup>3</sup>Department of Materials Function and Design, Nagoya Institute of Technology, Gokiso-cho, Showa-ku, Nagoya, Aichi 466-8555, Japan.

\*Corresponding authors: w69zhang@seu.edu.cn

‡ Qian Xie and Chengjie Lu contributed equally to this work.

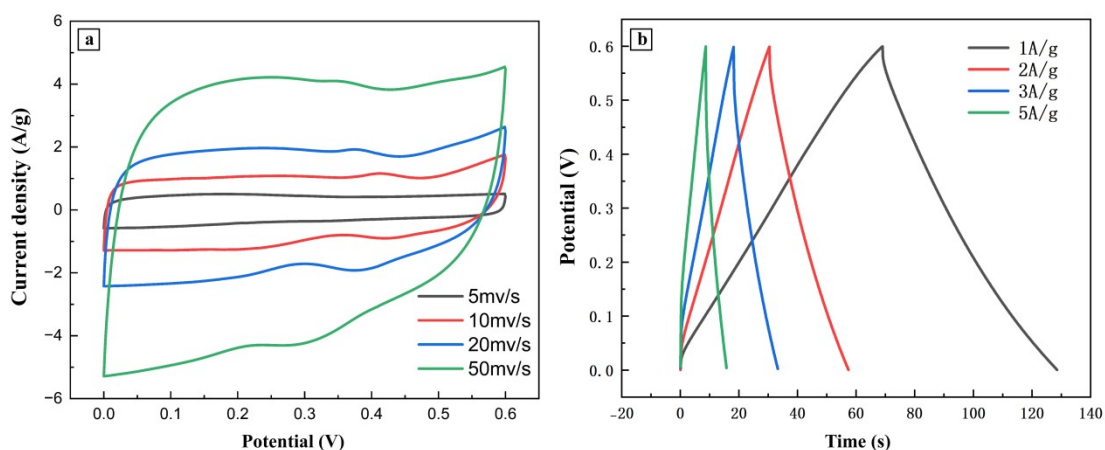

**Figure S1.** CV curves and GCD curves the MXene SSC based on PAN/PVA under 1-hour crosslinking.

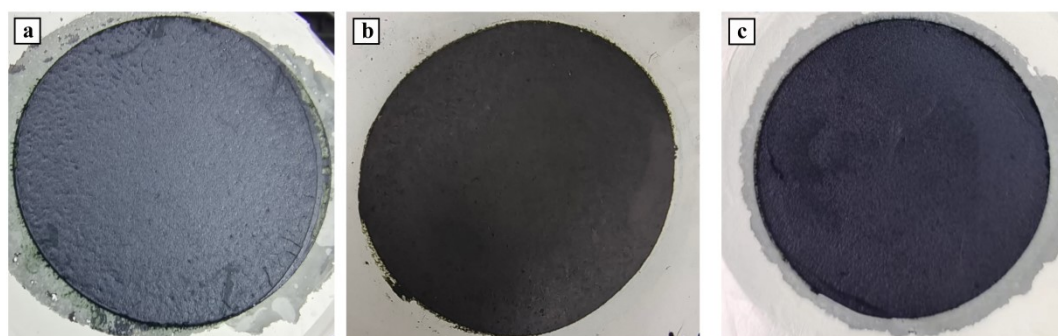

**Figure S2.** Optical photograph of the filtered electrode: (a) PANI/MXene; (b) NVO/MXene; (c) ZVO/MXene.

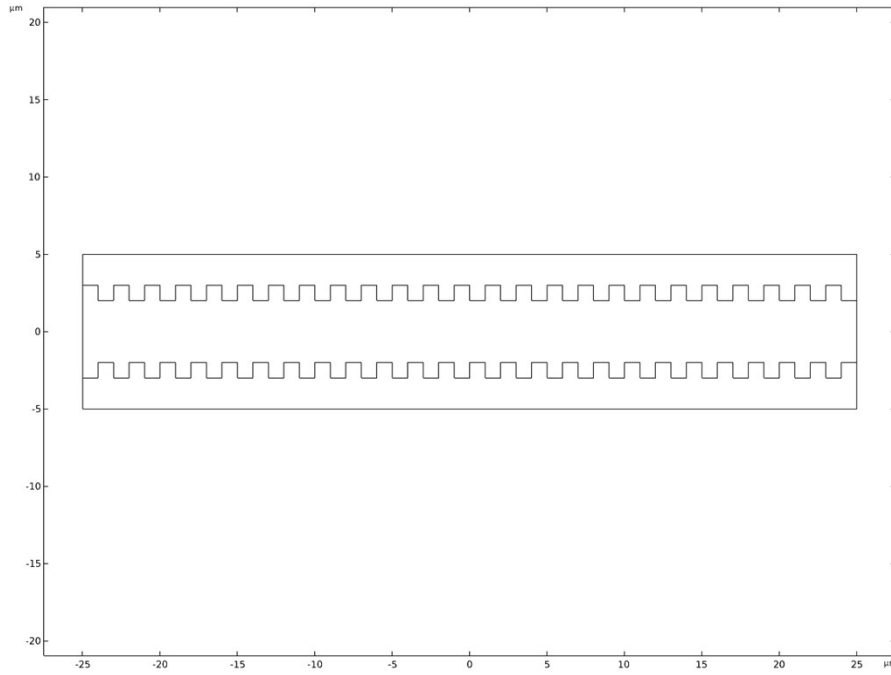

**Figure S3.** The cross-sectional schematic diagram of the device with porous all-in-one structure in the simulation and geometric parameters.

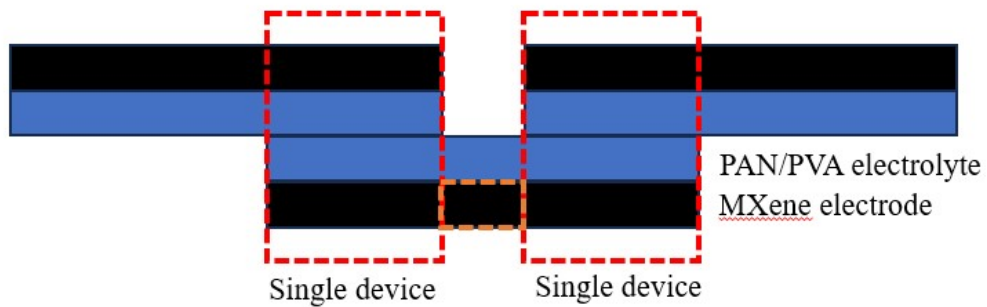

**Figure S4.** Schematic diagram of the integrated series-connected SSC.

**Table S1.** Swelling test results of PAN/PVA membranes under different cross-linking times.

| Cross-linking Time (min) | Polymer density $\rho_m$ ( $\text{g cm}^{-3}$ ) | Average molecular weight between crosslinking points $m_c$ ( $\text{g mol}^{-1}$ ) | Cross-linking density $\rho$ ( $\text{mol cm}^{-3}$ ) | Gel content W (%) |
|--------------------------|-------------------------------------------------|------------------------------------------------------------------------------------|-------------------------------------------------------|-------------------|
| 0                        | 0.3931                                          | 134.8391                                                                           | 0.0029                                                | 45.7172           |
| 20                       | 0.5596                                          | 126.7809                                                                           | 0.0044                                                | 52.9220           |
| 60                       | 0.6628                                          | 114.4689                                                                           | 0.0058                                                | 66.1251           |
| 120                      | 0.7607                                          | 95.6587                                                                            | 0.0080                                                | 75.4401           |
| 240                      | 0.7213                                          | 60.8322                                                                            | 0.0119                                                | 89.5709           |

**Table S2.** Comparison of the capacitance and energy density of our all-in-one devices with recently reported electrochemical capacitors.

| Electrode                                                                                  | Electrolyte                                                    | Maximum Power density<br>(mW cm <sup>-3</sup> ) | Maximum Energy density<br>(mWh cm <sup>-3</sup> ) | Reference        |
|--------------------------------------------------------------------------------------------|----------------------------------------------------------------|-------------------------------------------------|---------------------------------------------------|------------------|
| Fe <sub>x</sub> O <sub>y</sub> //MXene                                                     | PVA-KOH                                                        | 303.8                                           | 0.8431                                            | [1]              |
| 2D carbon                                                                                  | EMIMBF <sub>4</sub>                                            | 470                                             | 8.4                                               | [2]              |
| BP/MnO <sub>2</sub>                                                                        | PVA-Na <sub>2</sub> SO <sub>4</sub>                            | 58.6                                            | 0.59                                              | [3]              |
| LSG/VO <sub>x</sub>                                                                        | PVA-LiCl                                                       | 1000                                            | 7.7                                               | [4]              |
| MoS <sub>2</sub> //graphene/CN<br>T                                                        | Li <sub>2</sub> SO <sub>4</sub>                                | 75                                              | 16.36                                             | [5]              |
| Graphene//GO                                                                               | PVA-KOH                                                        | 1260                                            | 4.78                                              | [6]              |
| CNT//MnO <sub>2</sub>                                                                      | Na <sub>2</sub> SO <sub>4</sub>                                | 320                                             | 2.12                                              | [7]              |
| Ni@CNT                                                                                     | PVA-KOH                                                        | 440                                             | 1.39                                              | [8]              |
| MnO <sub>2</sub> //V <sub>2</sub> O <sub>5</sub>                                           | PVA-Na <sub>2</sub> SO <sub>4</sub>                            | 100                                             | 10.18                                             | [9]              |
| Ti <sub>3</sub> C <sub>2</sub> -Cu                                                         | H <sub>2</sub> SO <sub>4</sub>                                 | 8                                               | 0.1033                                            | [10]             |
| Mn(OH) <sub>2</sub> //Fe <sub>2</sub> O <sub>3</sub>                                       | LiNO <sub>3</sub>                                              | 123.57                                          | 5.125                                             | [11]             |
| Wood Carbon                                                                                | KOH                                                            | 2382                                            | 0.99                                              | [12]             |
| Si                                                                                         | EMI-TFSI                                                       | 9312                                            | 7.65                                              | [13]             |
| ZnCo <sub>2</sub> O <sub>4</sub> //Fe <sub>3</sub> O <sub>4</sub>                          | PVA-KOH                                                        | 166.7                                           | 2.32                                              | [14]             |
| SiC                                                                                        | PVA-KCl                                                        | 2800                                            | 1.31                                              | [15]             |
| MXene/wood                                                                                 | PAM-H <sub>2</sub> SO <sub>4</sub>                             | 337                                             | 3                                                 | [16]             |
| PANI-CNT                                                                                   | PVA-H <sub>2</sub> SO <sub>4</sub>                             | 609.7                                           | 11.4                                              | [17]             |
| CP@NCOH/NF//GH<br>/FNP/NF                                                                  | PVA-KOH                                                        | 750                                             | 4.1                                               | [18]             |
| PUCNT/RGO                                                                                  | PVA-H <sub>3</sub> PO <sub>4</sub>                             | 2031.2                                          | 8.63                                              | [19]             |
| Tungstate-PANI                                                                             | Neutral electrolytes                                           | 440                                             | 37                                                | [20]             |
| <b>MXene//PANI</b>                                                                         | <b>PAN/PVA-H<sub>2</sub>SO<sub>4</sub></b>                     | <b>2873</b>                                     | <b>7.1</b>                                        | <b>This work</b> |
| <b>PANI//NH<sub>4</sub>V<sub>4</sub>O<sub>10</sub></b>                                     | <b>PAN/PVA-<br/>(NH<sub>4</sub>)<sub>2</sub>SO<sub>4</sub></b> | <b>22.7</b>                                     | <b>22.3</b>                                       | <b>This work</b> |
| <b>NH<sub>4</sub>V<sub>4</sub>O<sub>10</sub>//Zn<sub>3</sub>V<sub>3</sub>O<sub>8</sub></b> | <b>PAN/PVA-Zn(OTf)<sub>2</sub></b>                             | <b>31.8</b>                                     | <b>41.8</b>                                       | <b>This work</b> |

## Reference

- [1] A. M. Patil, S. Moon, A. A. Jadhav, J. Hong, K. Kang, S. C. Jun, *Adv. Funct. Mater.* **2023**, 33, 2305264.
- [2] L. Yao, Q. Wu, P. Zhang, J. Zhang, D. Wang, Y. Li, X. Ren, H. Mi, L. Deng, Z. Zheng, *Adv. Mater.* **2018**, 30, 1706054.
- [3] Q. Yin, H. Jia, G. Liu, Q. Ji, *Adv. Funct. Mater.* **2022**, 32, 2111177.
- [4] A. Huang, M. F. El-Kady, X. Chang, M. Anderson, C.-W. Lin, C. L. Turner, R. B. Kaner, *Adv. Energy Mater.* **2021**, 11, 2100768.
- [5] Z. Bo, X. Cheng, H. Yang, X. Guo, J. Yan, K. Cen, Z. Han, L. Dai, *Adv. Energy Mater.* **2022**, 12, 2103394.
- [6] F. Liu, L. Zeng, Y. Chen, R. Zhang, R. Yang, J. Pang, L. Ding, H. Liu, W. Zhou, *Nano Energy* **2019**, 61, 18-26.
- [7] Y. Wang, S. Y. Su, L. J. Cai, B. C. Qiu, N. Wang, J. Xiong, C. Yang, X. M. Tao, Y. Chai, *Adv. Energy Mater.* **2019**, 9, 1900037.
- [8] Y. Jiang, C. Zhou, J. Liu, *Energy Storage Mater.* **2018**, 11, 75-82.
- [9] L. Lyu, K. Seong, J. Kim, W. Zhang, X. Jin, D. Kim, Y. Jeon, J. Kang, Y. Piao, *Nano-Micro Lett.* **2019**, 11, 88.
- [10] Y. Bai, C. Liu, T. Chen, W. Li, S. Zheng, Y. Pi, Y. Luo, H. Pang, *Angew. Chem. Int. Ed.* **2021**, 60, 25318.
- [11] J. Li, S. Luo, B. Zhang, J. Lu, W. Liu, Q. Zeng, J. Wan, X. Han, C. Hu, *Nano Energy* **2021**, 79, 105410.
- [12] F. Wang, J. Y. Cheong, J. Lee, J. Ahn, G. Duan, H. Chen, Q. Zhang, I.-D. Kim, S. Jiang, *Adv. Funct. Mater.* **2021**, 31, 2101077.
- [13] R. S. Gao, J. Tang, X. L. Yu, S. Q. Lin, K. Zhang, L.-C. Qin, *Adv. Funct. Mater.* **2020**, 30, 2002200.
- [14] D. Kong, Y. Wang, S. Huang, J. Hu, Y. Lim, B. Liu, S. Fan, Y. Shi, H. Yang, *Energy Storage Mater.* **2019**, 23, 653-663.
- [15] W. Li, Q. Liu, Z. Fang, L. Wang, S. Chen, F. Gao, Y. Ji, W. Yang, X. S. Fang, *Adv. Energy Mater.* **2019**, 9, 1900073.
- [16] D. Zhang, K. Yang, T. Zhang, M. Luo, M. Li, Z. Li, C. Liu, Y. Ling, W. Chen, X. Zhou, *Chem. Eng. J.* **2023**, 460, 141733.
- [17] S. Lee, J. Kim, H. Yu, D. Lee, S. Hong, S. Kim, S. Choi, N. Kim, H. Jeong, *Chem. Eng. J.* **2023**, 453, 139974.
- [18] H. Meng, S. Wang, X. Ma, D. Zhang, L. Zhang, X. Liu, L. Zhang, *Small* **2023**, 19, 2207496.
- [19] W. Ma, W. Li, M. Li, Q. Mao, Z. Pan, J. Hu, X. Li, M. Zhu, Y. Zhang, *Adv. Funct. Mater.* **2021**, 31, 2100195.
- [20] K. Xiao, D. Jiang, R. Amal, D.-W. Wang, *Adv. Mater.* **2018**, 30, 1800400.
